# Supplementary material
Source: Springer Nature journal article supplement (https://mijn.bsl.nl/resource/supplementary/13047_2013_592_MOESM12_ESM.pdf/7113170)

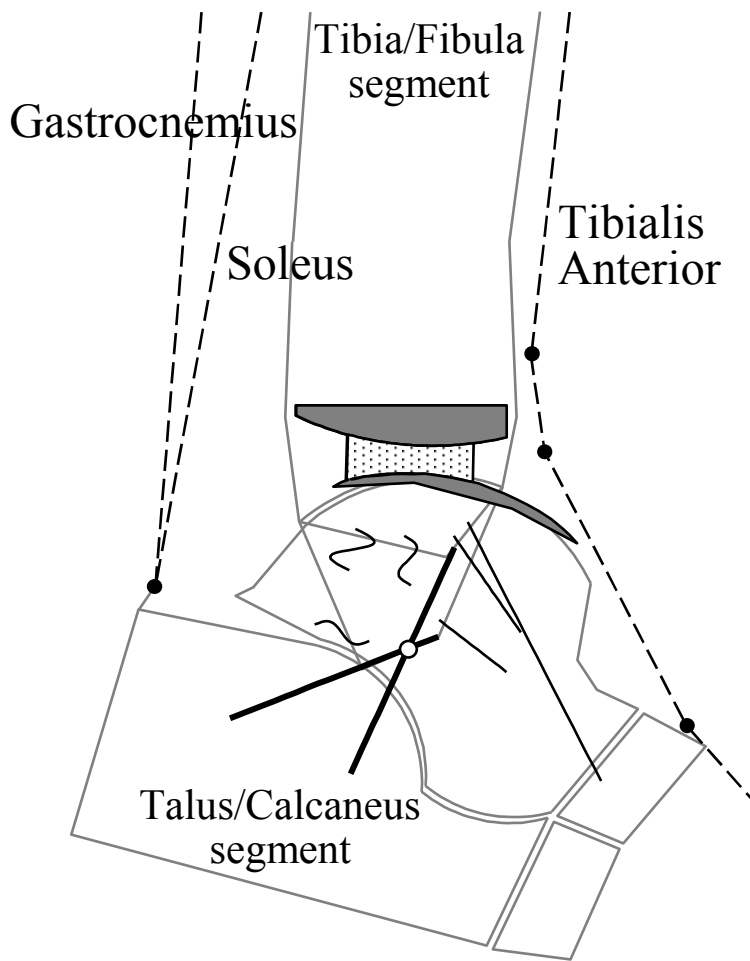

**Plantarflexion**

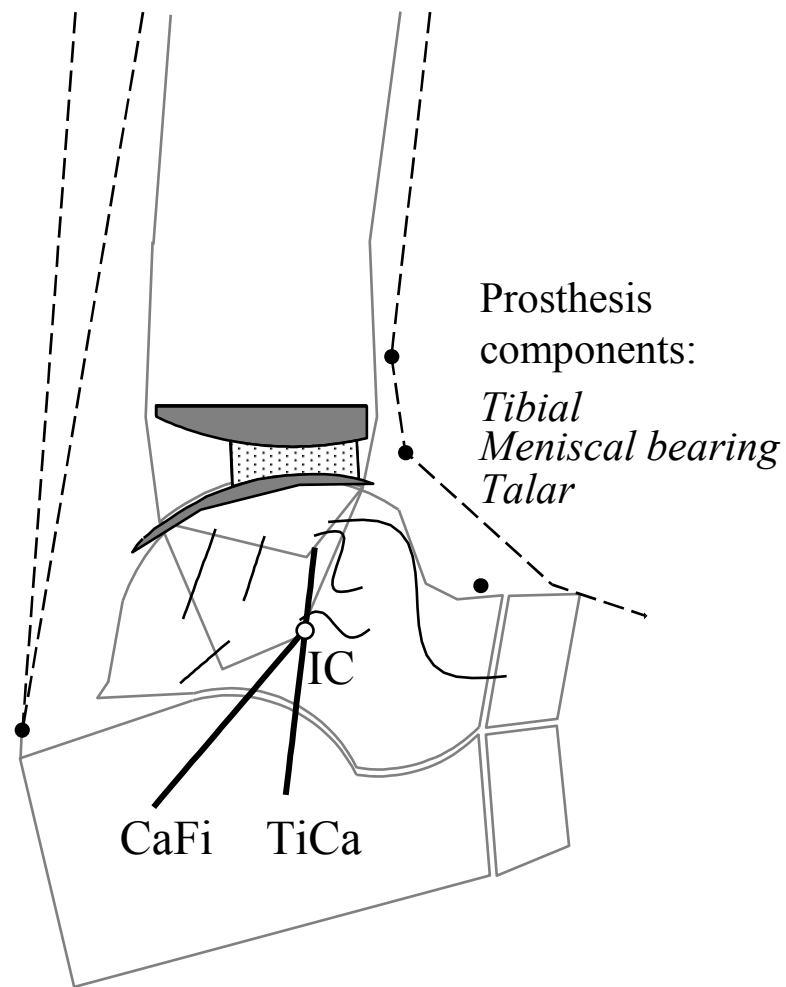

**Dorsiflexion**

Supplement: MOESM12 [file 7113170]
